# Supplementary material
Source: MDPI journal article supplement (https://www.mdpi.com/2075-4701/13/5/950)
Supplement: s1 [file s1]

## Supplementary Material

# Purification of Organosilicon Waste Silicon Powder with Hydrometallurgy

Liping Zhao <sup>1</sup>, Zuyu Li <sup>1</sup>, Fengshuo Xi <sup>1,2,\*</sup>, Shaoyuan Li <sup>1,2,\*</sup>, Wenhui Ma <sup>1,2,3,\*</sup>, Jijun Wu <sup>1,2</sup> and Kuixian Wei <sup>1,2</sup>

<sup>1</sup> Faculty of Metallurgical and Energy Engineering, Kunming University of Science and Technology, Kunming 650093, China

<sup>2</sup> National Engineering Research Center of Vacuum Metallurgy, State Key Laboratory of Complex Nonferrous Metal Resources Clean Utilization, Kunming University of Science and Technology, Kunming 650093, China

<sup>3</sup> School of Science and Technology, Pu'er University, Pu'er 665000, China

\* Correspondence: fengshuoxi@126.com (F.X.); lsy415808550@163.com (S.L.); mwhsilicon@126.com (W.M.)

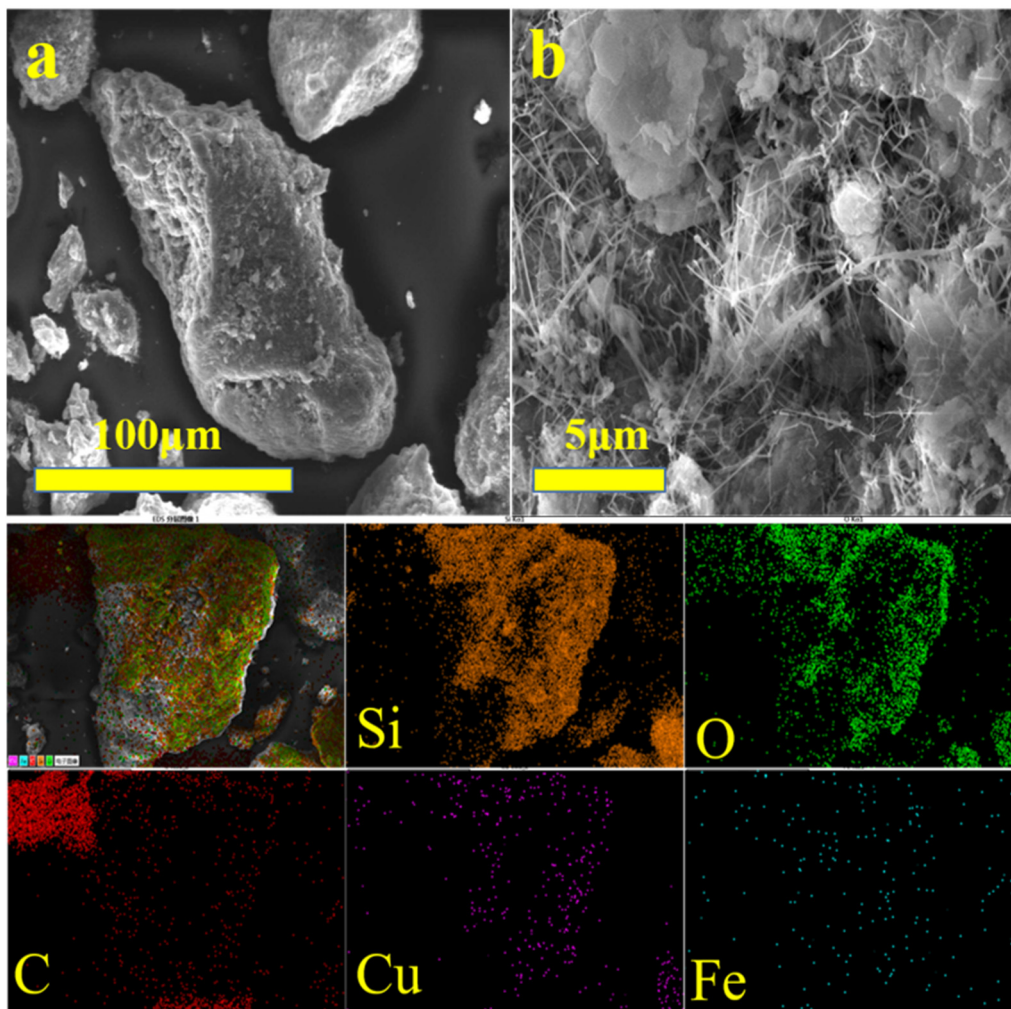

Figure S1. Micrograph and element mapping analysis of the annealed samples.
